# Supplementary material
Source: publisher site journal article supplement (https://www.dovepress.com/article/368040)
Supplement: Supplementary file 1 [file get_supplementary_file.php]

**Supplementary Table 1.** Pathway annotations across the 5 functional themes of the nCounter Human Host Response panel.

| <b>Functional theme</b>       | <b>Pathway</b>                                             | <b>Number of genes</b> |
|-------------------------------|------------------------------------------------------------|------------------------|
| Host Susceptibility           | Virus-Host Interaction                                     | 14                     |
|                               | Angiotensin System                                         | 12                     |
| Interferon Response           | ALPK1 Signaling                                            | 7                      |
|                               | DNA Sensing                                                | 44                     |
|                               | Glycan Sensing                                             | 38                     |
|                               | Inflammasomes Interferon Response Genes JAK-STAT Signaling | 22                     |
|                               | MAPK Signaling                                             | 24                     |
|                               | NLR Signaling                                              | 71                     |
|                               | RNA Sensing                                                | 24                     |
|                               | TLR Signaling                                              | 95                     |
|                               | TNF Signaling                                              | 56                     |
|                               | Type I Interferon Signaling                                | 76                     |
|                               | Type II Interferon Signaling                               | 72                     |
|                               | Type III Interferon Signaling                              | 68                     |
| Innate Immune Cell Activation | Chemokine Signaling                                        | 41                     |
|                               | Cytotoxicity                                               | 75                     |
|                               | Host Defense Peptides                                      | 11                     |
|                               | IL-1 Signaling                                             | 15                     |
|                               | IL-17 Signaling                                            | 45                     |
|                               | IL-2 Signaling                                             | 20                     |
|                               | IL-6 Signaling                                             | 29                     |
|                               | JAK-STAT Signaling                                         | 16                     |
|                               | MAPK Signaling                                             | 71                     |
|                               | Mononuclear Cell Migration                                 | 24                     |
|                               | Myeloid Activation                                         | 54                     |
|                               | Myeloid Inflammation                                       | 167                    |
|                               | NF-kappaB Signaling                                        | 27                     |
|                               | NK Activity                                                | 75                     |
|                               | NO Signaling                                               | 32                     |
|                               | Other Interleukin Signaling                                | 9                      |
|                               | Oxidative Stress Response                                  | 77                     |
|                               | Phagocytosis                                               | 44                     |
|                               | PPAR Signaling                                             | 30                     |
|                               | TGF-beta Signaling                                         | 7                      |
| TNF Signaling                 | 28                                                         |                        |
| Adaptive Immune Response      | BCR Signaling                                              | 72                     |
|                               | Complement System                                          | 55                     |
|                               | Cytotoxicity                                               | 23                     |
|                               | IL-1 Signaling                                             | 11                     |
|                               | IL-17 Signaling                                            | 45                     |
|                               | IL-2 Signaling                                             | 20                     |

|             |                                            |    |
|-------------|--------------------------------------------|----|
|             | IL-6 Signaling                             | 16 |
|             | Immune Exhaustion                          | 17 |
|             | Immune Memory                              | 9  |
|             | JAK-STAT Signaling                         | 71 |
|             | Lymphocyte Trafficking                     | 25 |
|             | MAPK Signaling                             | 24 |
|             | MHC Class I Antigen Presentation           | 34 |
|             | MHC Class II Antigen Presentation          | 17 |
|             | Mononuclear Cell Migration                 | 54 |
|             | NF-kappaB Signaling                        | 75 |
|             | Other Interleukin Signaling                | 77 |
|             | T-cell Costimulation                       | 28 |
|             | TCR Signaling                              | 92 |
|             | TGF-beta Signaling                         | 28 |
|             | TH1 Differentiation                        | 19 |
|             | TH17 Differentiation                       | 36 |
|             | TH2 Differentiation                        | 18 |
|             | TH9 Differentiation                        | 10 |
|             | TNF Signaling                              | 72 |
|             | Treg Differentiation                       | 14 |
| <hr/>       |                                            |    |
| Homeostasis | Apoptosis                                  | 27 |
|             | Angiotensin System                         | 12 |
|             | Autophagy                                  | 15 |
|             | Coagulation                                | 33 |
|             | HIF1A Signaling                            | 21 |
|             | Leukotriene and Prostaglandin Inflammation | 13 |
|             | Lysosome                                   | 27 |
|             | MAPK Signaling                             | 24 |
|             | NO Signaling                               | 9  |
|             | Oxidative Stress Response                  | 44 |
|             | Proteotoxic Stress                         | 28 |
|             | TGF-beta Signaling                         | 28 |
|             | Tissue Stress                              | 7  |
|             | TNF Signaling                              | 72 |
| <hr/>       |                                            |    |

Supplementary table 2: Response to biologic treatment at 3 months after therapy start discriminated according to treatment received

|                    | Responders | Non-responders |
|--------------------|------------|----------------|
| Crohn's disease    | 2          | 2              |
| Anti-TNF           | 0          | 2              |
| Vedolizumab        | 1          | 0              |
| Ustekinumab        | 1          | 0              |
| Ulcerative colitis | 15         | 5              |
| Anti-TNF           | 13         | 3              |
| Vedolizumab        | 2          | 1              |
| Ustekinumab        | 0          | 0              |

TNF, tumor necrosis factor

## Supplementary figure 1

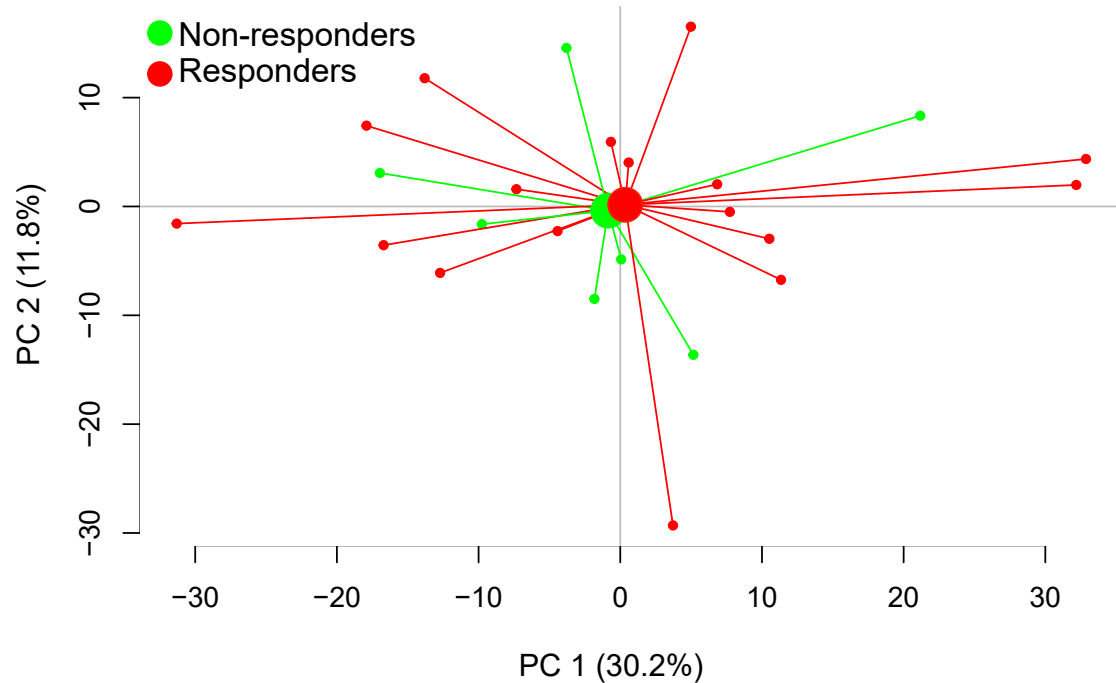

**Supplementary figure 1: Gene expression analysis of active IBD patients according to response to biologic therapy.** Inflamed colonic biopsies were sampled from UC and CD patients, before the beginning of biologic therapy and analyzed using NanoString nCounter Host Response panel for gene expression. Patients were grouped according to therapy response after 3 months from treatment start. Principal component analysis based on the full set of genes is shown between responders (n=17) and non responders (n=7). PC, principal component

## Supplementary figure 2

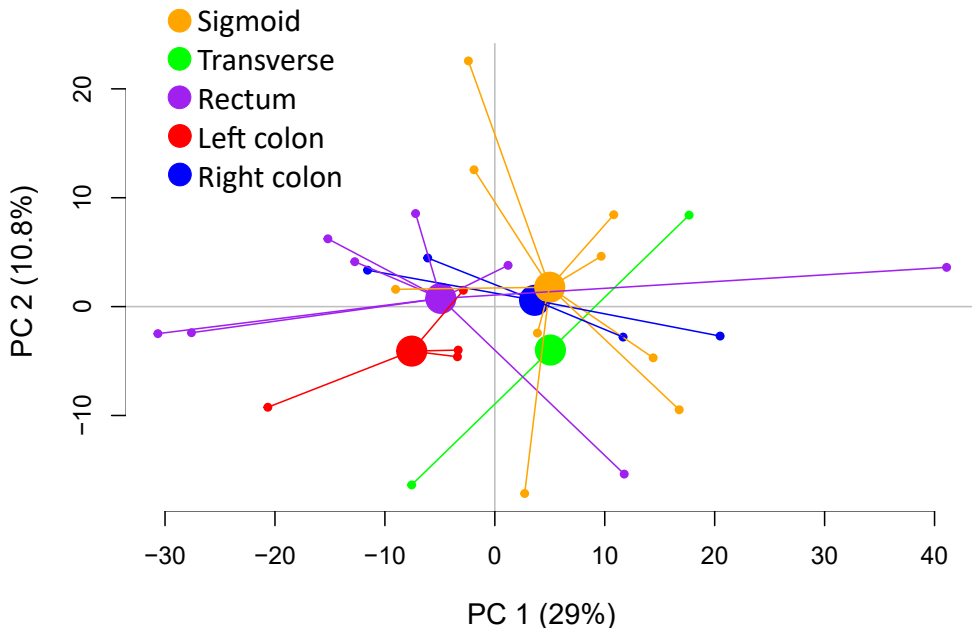

**Supplementary figure 2: Gene expression analysis of active IBD patients according to sampling location.** Inflamed colonic biopsies were sampled from UC and CD patients with active disease and analyzed using NanoString nCounter Host Response panel for gene expression (776 genes). Principal component analysis based on the full set of genes is shown between samples collected from the rectum (n=8), sigmoid colon (n=9), left colon (n=4), transverse colon (n=2) and right colon (n=4). PC, principal component.

### Supplementary figure 3

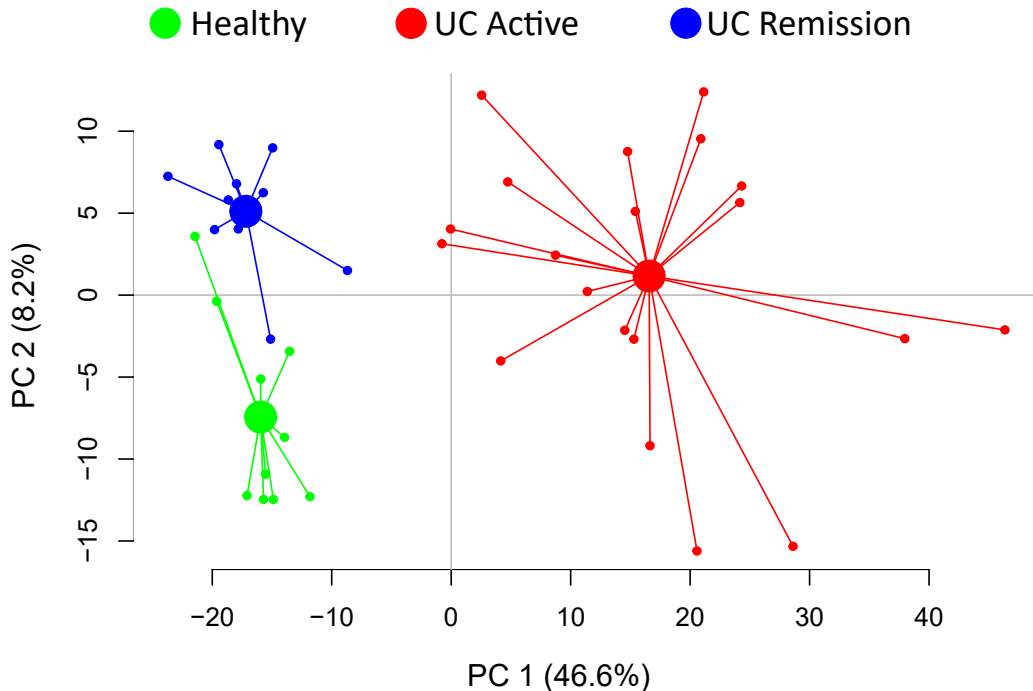

**Supplementary figure 3: Gene expression analysis of UC patients with active disease, UC patients in remission and healthy subjects.** Mucosal gene expression data in inflamed biopsies from UC patients in active disease, and sigmoid biopsies from UC patients in remission and healthy subjects were analyzed using the NanoString nCounter Host response panel, 776 genes. Principal component analysis based on the full set of genes is shown between UC active (n=20), UC remission (n=10) and healthy subjects (n=10). PC, principal component; UC, ulcerative colitis.
